# Supplementary material for: Plasma levels of progranulin, a tumorigenic protein, are persistently elevated during the first month after minimally invasive colorectal cancer resection
Source: PubMed Central journal article supplement — J Gastrointest Oncol. 2024 Oct 12;15(5):2157–65. doi: 10.21037/jgo-24-114 (PMC11565126; doi:10.21037/jgo-24-114), 2024-10-12
Supplement: jgo-15-05-2157-dss.pdf [file jgo-15-05-2157-dss.pdf]

## Data Sharing Statement

|                     |                                                                                                                                                     |                                                                                                                                                                                                                                 |
|---------------------|-----------------------------------------------------------------------------------------------------------------------------------------------------|---------------------------------------------------------------------------------------------------------------------------------------------------------------------------------------------------------------------------------|
| <b>Article Info</b> | <a href="https://dx.doi.org/10.21037/jgo-24-114">https://dx.doi.org/10.21037/jgo-24-114</a>                                                         |                                                                                                                                                                                                                                 |
| <b>Item</b>         | <b>Question</b>                                                                                                                                     | <b>Authors' Response<br/>(place "-" if not applicable)</b>                                                                                                                                                                      |
| 1                   | Would you like to share data collected for your study to others?                                                                                    | No.                                                                                                                                                                                                                             |
| 2                   | If not, would you like to share the reason for your decision?                                                                                       | The datasets presented in this article are not readily available because all data use for the research has been included in the article. Other patients' health information data cannot be provided as per the IRB regulations. |
| 3                   | What data in particular will be shared?                                                                                                             | -                                                                                                                                                                                                                               |
| 4                   | Any other documents will be shared? Such as study protocol, statistical analysis plan, informed consent form, clinical study report, analytic code. | -                                                                                                                                                                                                                               |
| 5                   | When will data availability begin?                                                                                                                  | -                                                                                                                                                                                                                               |
| 6                   | When will data availability end?                                                                                                                    | -                                                                                                                                                                                                                               |
| 7                   | To whom will you share the data?                                                                                                                    | -                                                                                                                                                                                                                               |
| 8                   | For what type of analysis or purpose?                                                                                                               | -                                                                                                                                                                                                                               |
| 9                   | How or where can the data/documents be obtained?                                                                                                    | -                                                                                                                                                                                                                               |
| 10                  | Any other restrictions?                                                                                                                             | -                                                                                                                                                                                                                               |
